# Supplementary material for: In situ synergistic halogen passivation of semiconducting PbS quantum dot inks for efficient photovoltaics
Source: Royal Society of Chemistry journal article supplement (doi:10.1039/d3nr05951k), 2024-01-01
Supplement: d3nr05951k1.pdf [file d3nr05951k1.pdf]

## Electronic Supplementary Material

### ***In-situ* Synergistic Halogen Passivation in the Direct Synthesis of PbS Quantum Dot Semi-conductive Inks for High-Efficiency Photovoltaics**

Xiaobo Ding,<sup>[a,b]</sup> Xin Wen,<sup>[a]</sup> Yuto Kawata,<sup>[c]</sup> Yang Liu,<sup>[a]</sup> Guozheng Shi,<sup>[a,c]</sup> Refka ben Ghazi,<sup>[a]</sup> Xiang Sun,<sup>[a]</sup> Yujie Zhu,<sup>[a]</sup> Hao Wu,<sup>[a]</sup> Haotian Gao,<sup>[a]</sup> Qing Shen,<sup>[c]</sup> Zeke Liu,<sup>\*[a,b]</sup> and Wanli Ma<sup>[a,b]</sup>

<sup>[a]</sup> X. Ding, X. Wen, Y. Liu, Dr. G. Shi, R. Ghazi, X. Sun, H. Wu, H. Gao, *Prof. Z. Liu, Prof. W. Ma*

Institute of Functional Nano & Soft Materials (FUNSOM), Joint International Research Laboratory of Carbon-Based Functional Materials and Devices, Soochow University, Suzhou, 215123, Jiangsu, PR China

<sup>[b]</sup> *Prof. Z. Liu, Prof. W. Ma*

Jiangsu Key Laboratory of Advanced Negative Carbon Technologies, Soochow University, Suzhou, 215123, Jiangsu, PR China  
199 Ren'ai Road, Suzhou, 215123, Jiangsu, PR China  
E-mail: zkliu@suda.edu.cn, wlma@suda.edu.cn.

<sup>[c]</sup> Y. Kawata, Dr. G. Shi, *Prof. Q. Shen*

Faculty of Informatics and Engineering, The University of Electro-Communications, Tokyo 182-8585, Japan.

[†] X. Ding, X. Wen contributed equally to this work.

## Chemicals

Lead iodide (PbI<sub>2</sub>, 99+ %), Lead bromide (PbBr<sub>2</sub>, 98 %), lead chloride (PbCl<sub>2</sub>, 98 %), Lead acetate trihydrate (PbAc<sub>2</sub>·3H<sub>2</sub>O, 99 %), hexamethyldisilathiane (TMS-S, 98 %), Diphenyl thiourea (DPhTA, 99 %), Zinc acetate dihydrate (ZnAc<sub>2</sub>·2H<sub>2</sub>O, 99.0 %), Potassium hydroxide (KOH, 99.98 %), Methanol (MeOH, 99.9 %), Chloroform (CF, 95 %), Ethanol (95 %), Oleic acid (OA, 90 %), 1-Octadecene (ODE, 90 %), Hexane (95 %), Isopropanol (IPA, 95 %), Acetone (95 %), Toluene (95 %), N,N'-dimethylformamide (DMF, 99.8 % anhydrous), Butyl amine (BA, >99 %), Acetonitrile (ACN, 99 %), Ethanedithiol (EDT, 99 %).

## Synthesis of PbS-OA CQDs

Oleate-capped PbS CQDs were synthesized using a hot injection method with some modifications.<sup>1-2</sup> The synthesis is the same as in previous work. Briefly, 10 mmol of lead acetate trihydrate and 7 g of OA were dissolved in 60 g of ODE in a three-neck flask by heating the mixture to 100 °C under vacuum for 2 h. The sulfide precursor was mixed with 1 mL of hexamethyldisilathiane and 9 mL of 1-octadecene. The reaction was initiated by rapid injection of the sulfide precursor into the lead precursor solution. After synthesis, the solution was transferred into a nitrogen-filled glovebox. CQDs were purified by adding isopropanol, followed by centrifugation. The extracted CQDs were redispersed in hexane and acetone was added to precipitate CQDs, followed by centrifugation. Then the CQDs were stored in the glovebox.

## Synthesis of ZnO Nanoparticles

ZnO nanoparticles were synthesized according to the literature with some modifications.<sup>3</sup> 2.95 g of zinc acetate dihydrate ( $\text{ZnAc}_2 \cdot \text{H}_2\text{O}$ ) was added to 125 mL methanol (MeOH) in a three-necked flask. 1.48 g potassium hydroxide (KOH) was dissolved in 60 mL MeOH and dropwise added to the zinc acetate solution under vigorous stirring at 63.5 °C for 3 h. After cooling down, ZnO nanocrystals were extracted via centrifugation and washed twice with methanol. Finally, 10 mL of chloroform (CF) and 10 mL MeOH were added to the precipitates and the solution was filtered with a 0.45  $\mu\text{m}$  filter.

## SCLC measurements

Electron-only devices were fabricated (Glass/ITO/ZnO/PbS-CQD/ZnO/Ag) The I-V curves were scanned from 0 V to +5.0 V at 0.01 V interval steps. The trap-filling region can be identified by a significant increase in the current injection at a voltage ( $>V_{\text{TFL}}$ ) where all the traps are filled. From this region, the trap density was estimated using the following equation:

$$N_t = \frac{2V_{\text{TFL}}\epsilon\epsilon_0}{eL^2} \quad \text{Eq. (1)}$$

where  $V_{\text{TFL}}$  is the trap-filled limit voltage,  $\epsilon$  is the relative dielectric constant (18 for PbS CQDs),  $\epsilon_0$  is the vacuum permittivity,  $e$  is the electron charge, and  $L$  is the thickness of the CQD films. The thickness was determined using a thickness profilometer.

The electron mobilities ( $\mu_e$ ) can also be extracted from the SCLC measurements, as calculated from the logarithm of the  $J$ - $V$  curve obtained in the dark condition according to the mobility formula:

$$J = \frac{9}{8} \epsilon_0 \epsilon_r \mu_{h,e} \frac{V^2}{d^3}$$

where  $\epsilon$  is the relative dielectric constant (18 for PbS CQDs),  $\epsilon_0$  is the vacuum permittivity, and  $d$  is the thickness of the CQD films. The thickness was determined using a thickness profilometer.

## TRPL Fitting

The TRPL decay curves were fitted with a bi-exponential decay function of  $I(t) = A_1 \times \exp[-t/\tau_1] + A_2 \times \exp[-t/\tau_2]$ . Here,  $A_1$  and  $A_2$  correspond to the decay amplitudes of the curve.  $\tau_1$  and  $\tau_2$  correspond to the decay time constants of fast and slow components, respectively. The average lifetime  $\tau_{\text{avg}}$  was calculated by  $\tau_{\text{avg}} = (A_1\tau_1 + A_2\tau_2)/(A_1 + A_2)$ .

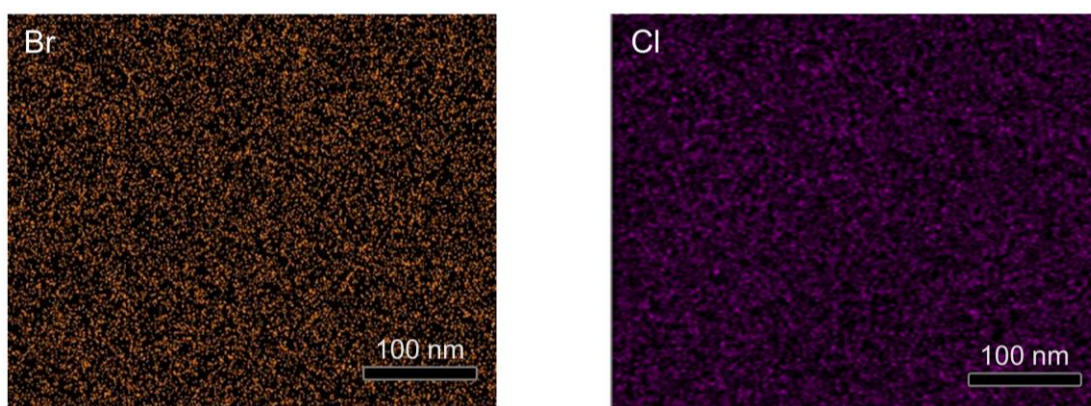

**Figure S1.** Energy dispersive spectroscopy (EDS) mappings of the MHP CQD films.

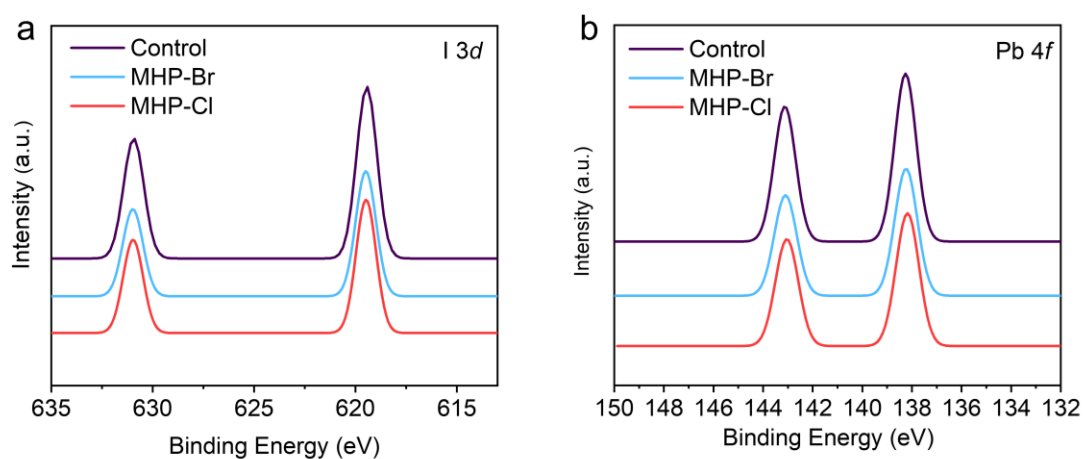

**Figure S2.** XPS spectra of the CQD films in the I 3d and Pb 4f regions.

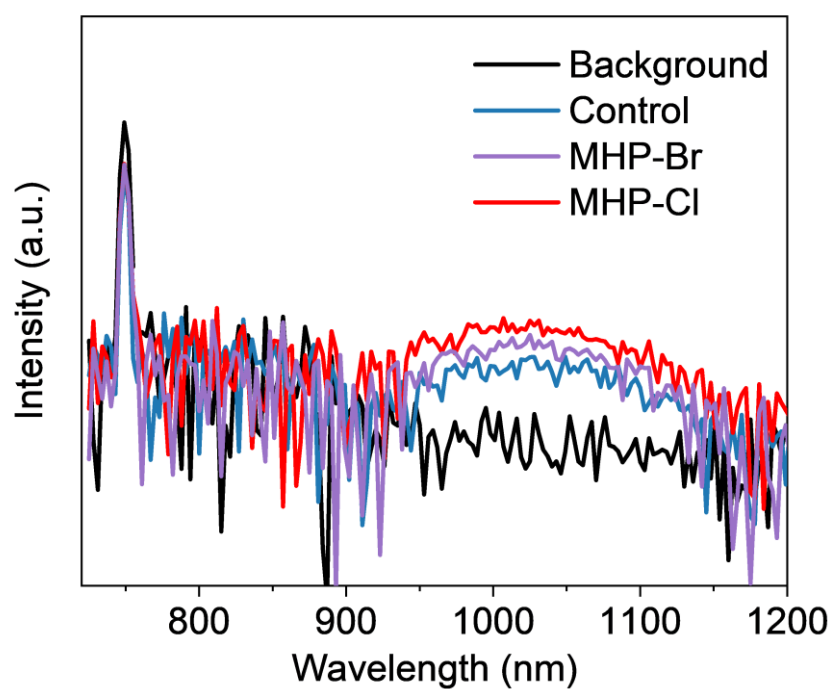

**Figure S3.** PLQY measurements of the CQD inks.

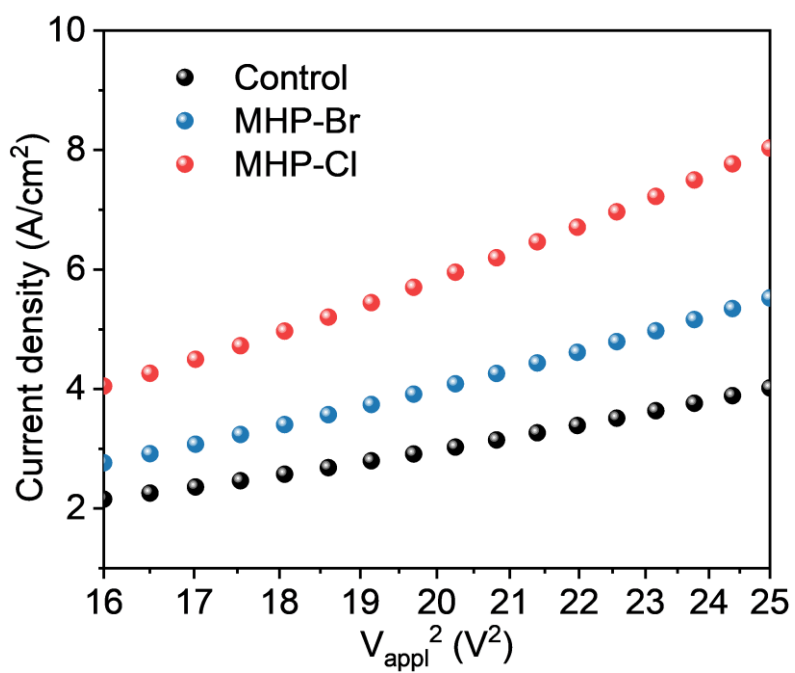

**Figure S4.**  $J$ - $V^2$  curve of SCLC devices for the CQD films.

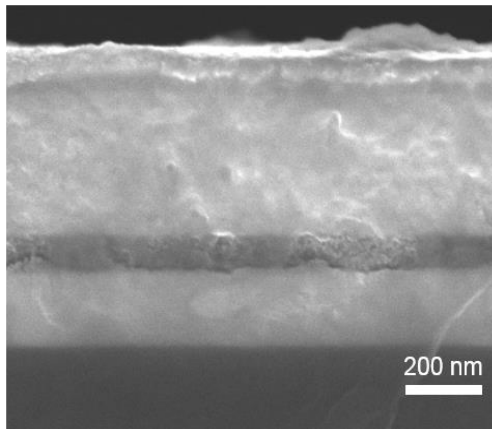

**Figure S5.** Cross-section SEM image of control device.

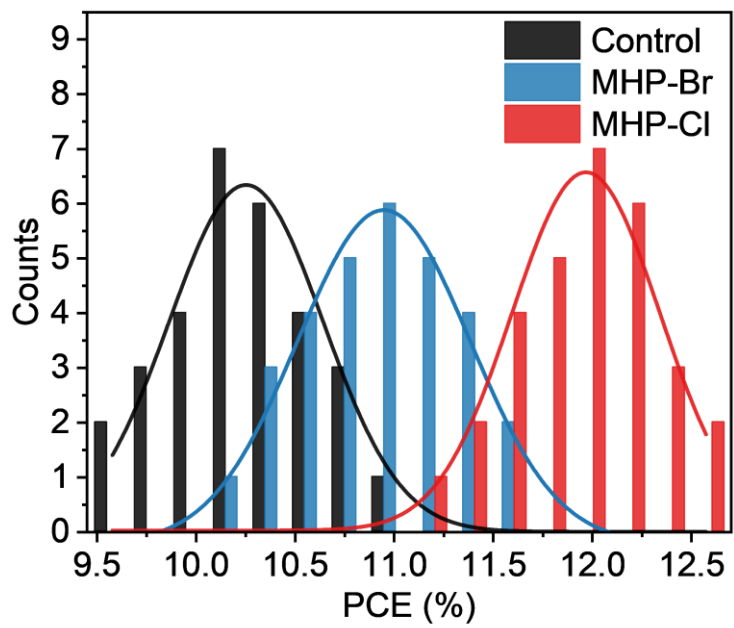

**Figure S6.** Efficiency histogram of the CQD devices.

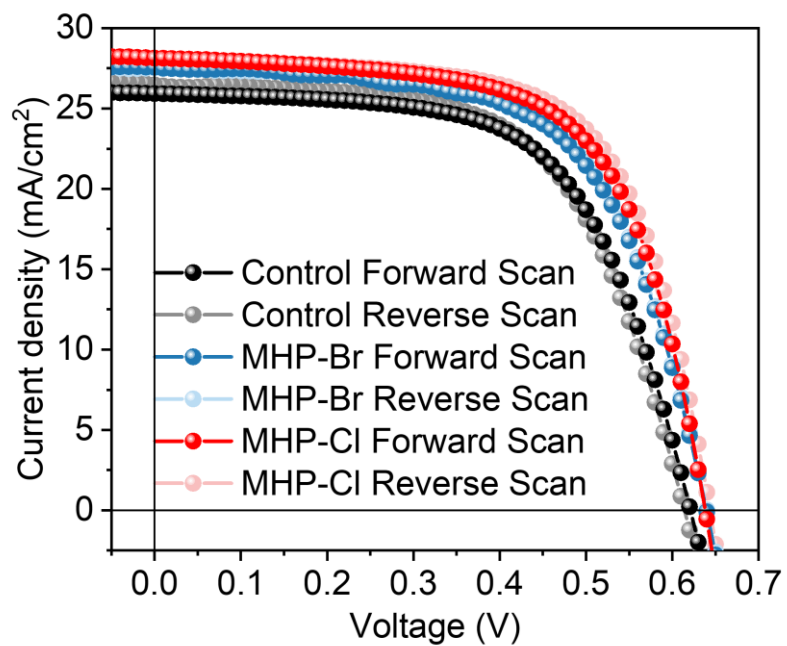

**Figure S7.** *J-V* curve of the CQD devices (forward scan and reverse scan).

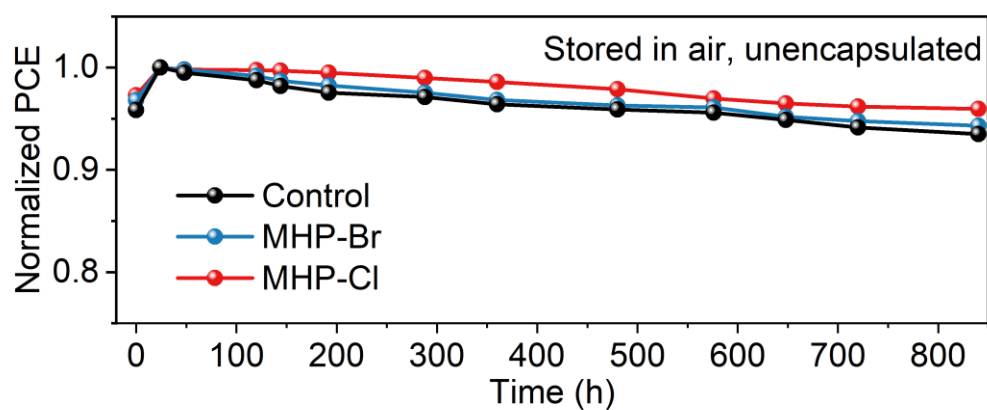

**Figure S8.** Stability test of unencapsulated devices stored in the air.

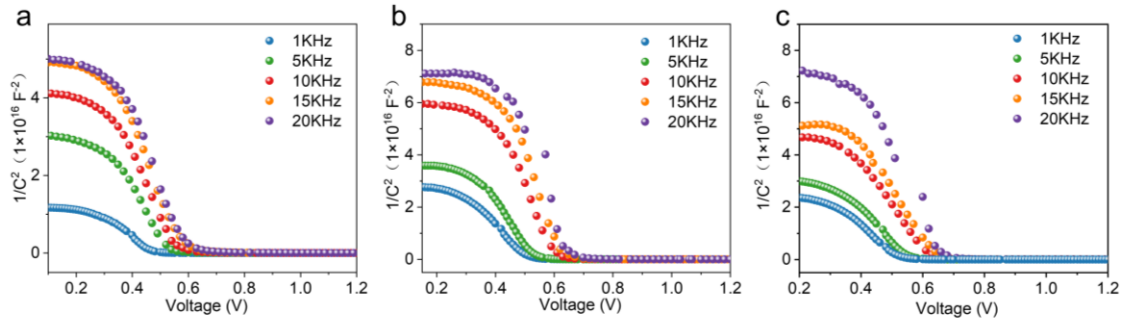

**Figure S9.** C-V measurement of control (a), MHP-Br (b) and MHP-Cl (c) devices at different frequencies.

**Table S1.** TRPL measurement of the CQD inks.

| Condition | $A_1$ | $\tau_1$ ( $\mu\text{s}$ ) | $A_2$ | $\tau_1$ ( $\mu\text{s}$ ) | $\tau_{\text{avg}}$ ( $\mu\text{s}$ ) |
|-----------|-------|----------------------------|-------|----------------------------|---------------------------------------|
| Control   | 0.21  | 0.20                       | 0.20  | 2.06                       | 1.10                                  |
| MHP-Br    | 0.23  | 0.32                       | 0.24  | 2.7                        | 1.54                                  |
| MHP-Cl    | 0.19  | 1.29                       | 0.17  | 3.24                       | 2.21                                  |

**Table S2.** TRPL measurement of the CQD films.

| Condition | $A_1$ | $\tau_1$ (ns) | $A_2$ | $\tau_1$ (ns) | $\tau_{\text{avg}}$ (ns) |
|-----------|-------|---------------|-------|---------------|--------------------------|
| Control   | 0.53  | 0.74          | 0.47  | 28.35         | 13.72                    |
| MHP-Br    | 0.57  | 0.72          | 0.43  | 19.55         | 8.81                     |
| MHP-Cl    | 0.59  | 0.69          | 0.41  | 18.76         | 8.09                     |



**Table S3.** Photovoltaic parameters of PbS CQD devices synthesized with different amounts of PbBr<sub>2</sub> in the precursor.

| Condition              | $V_{oc}$ (V) | $J_{sc}$ (mA/cm <sup>2</sup> ) | FF (%) | PCE (%) |
|------------------------|--------------|--------------------------------|--------|---------|
| Control                | 0.64         | 26.63                          | 62.45  | 10.64   |
| PbBr <sub>2</sub> 5 %  | 0.65         | 27.56                          | 64.86  | 11.61   |
| PbBr <sub>2</sub> 10 % | 0.65         | 26.78                          | 64.32  | 11.19   |
| PbBr <sub>2</sub> 20 % | 0.63         | 26.13                          | 63.69  | 10.48   |

**Table S4.** Photovoltaic parameters of PbS CQD devices synthesized with different amounts of PbCl<sub>2</sub> in the precursor.

| Condition              | $V_{oc}$ (V) | $J_{sc}$ (mA/cm <sup>2</sup> ) | FF    | PCE (%) |
|------------------------|--------------|--------------------------------|-------|---------|
| Control                | 0.64         | 26.63                          | 62.45 | 10.64   |
| PbCl <sub>2</sub> 5 %  | 0.65         | 25.18                          | 67.07 | 10.98   |
| PbCl <sub>2</sub> 10 % | 0.66         | 27.73                          | 68.78 | 12.58   |
| PbCl <sub>2</sub> 20 % | 0.64         | 28.05                          | 65.49 | 11.76   |

**Table S5.** EIS parameters of the CQD photovoltaic devices.

| Condition | $R_s$ ( $\Omega$ ) | $R_p$ ( $\Omega$ ) | CPE (F)               |
|-----------|--------------------|--------------------|-----------------------|
| Control   | 61.72              | 6894               | $2.91 \times 10^{-8}$ |
| MHP-Br    | 29.08              | 4321               | $6.26 \times 10^{-9}$ |
| MHP-Cl    | 15.25              | 1957               | $3.24 \times 10^{-9}$ |

1. M. A. Hines, G. D. Scholes, Colloidal PbS Nanocrystals with Size-Tunable Near-Infrared Emission: Observation of Post-Synthesis Self-Narrowing of the Particle Size Distribution, *Adv. Mater.*, 2003, **15**, 1844-1849.
2. Y. Wang, K. Lu, L. Han, Z. Liu, G. Shi, H. Fang, S. Chen, T. Wu, F. Yang, M. Gu, S. Zhou, X. Ling, X. Tang, J. Zheng, M. A. Loi, W. Ma, In Situ Passivation for Efficient PbS Quantum Dot Solar Cells by Precursor Engineering, *Adv. Mater.*, 2018, **30**, 1704871.
3. W. J. Beek, M. M. Wienk, M. Kemerink, X. Yang, R. A. Janssen, Hybrid zinc oxide conjugated polymer bulk heterojunction solar cells, *J. Phys. Chem. B*, 2005, **109**, 9505-9516.
